# Supplementary material for: De novo assembly and analysis of the transcriptome of the Dermacentor marginatus genes differentially expressed after blood feeding and long-term starvation
Source: Research Square preprint supplement (doi:10.21203/rs.3.rs-57342/v3), 2020-10-19
Supplement: Supplementary file 1 [file 973058320a42c659362b0d44.xlsx]

## Sheet: Sheet1
Supplementary Table 4 Raw reads alignment results.
Sample	Valid reads	Mapped reads	Unique Mapped reads	Multi Mapped reads	PE Mapped reads	Reads map to sense strand	Reads map to antisense strand	Non-splice reads	Splice reads
M_tick1	51764266	15,309,617(29.58%)	11,181,515(21.60%)	4,128,102(7.97%)	10,129,468(19.57%)	7,759,710(14.99%)	7,062,621(13.64%)	10,980,252(21.21%)	3,842,079(7.42%)
M_tick2	47413932	14,540,112(30.67%)	10,635,265(22.43%)	3,904,847(8.24%)	9,512,220(20.06%)	7,275,205(15.34%)	6,558,661(13.83%)	10,075,831(21.25%)	3,758,035(7.93%)
M_tick3	51407408	17,240,156(33.54%)	12,217,816(23.77%)	5,022,340(9.77%)	11,375,946(22.13%)	8,452,519(16.44%)	7,613,547(14.81%)	11,339,610(22.06%)	4,726,456(9.19%)
H_tick1	47433076	15,340,474(32.34%)	11,909,267(25.11%)	3,431,207(7.23%)	12,448,658(26.24%)	7,477,333(15.76%)	7,226,058(15.23%)	9,321,248(19.65%)	5,382,143(11.35%)
H_tick2	50818072	19,165,243(37.71%)	14,926,257(29.37%)	4,238,986(8.34%)	15,434,114(30.37%)	9,426,739(18.55%)	9,118,911(17.94%)	11,332,420(22.30%)	7,213,230(14.19%)
H_tick3	55791690	19,633,932(35.19%)	15,198,351(27.24%)	4,435,581(7.95%)	15,675,936(28.10%)	9,644,625(17.29%)	9,298,716(16.67%)	11,642,907(20.87%)	7,300,434(13.09%)
F_tick1	52813642	17,892,260(33.88%)	13,320,858(25.22%)	4,571,402(8.66%)	11,773,712(22.29%)	8,999,234(17.04%)	8,453,174(16.01%)	10,140,287(19.20%)	7,312,121(13.85%)
F_tick2	45985882	13,579,945(29.53%)	10,036,373(21.82%)	3,543,572(7.71%)	8,853,382(19.25%)	6,775,735(14.73%)	6,346,730(13.80%)	8,028,072(17.46%)	5,094,393(11.08%)
F_tick3	44381704	15,164,323(34.17%)	11,257,129(25.36%)	3,907,194(8.80%)	9,971,074(22.47%)	7,585,976(17.09%)	7,123,539(16.05%)	8,940,353(20.14%)	5,769,162(13.00%)
